# Supplementary material for: Comparative Pan-Genomic Analysis Revealed an Improved Multi-Locus Sequence Typing Scheme for Staphylococcus aureus
Source: MDPI journal article supplement (doi:10.3390/genes13112160), 2022-11-19
Supplement: s1 [file s1]

**Table S1. New STs assigned through Sequence Type Assigning.** The table represents the new STs that were assigned based on the new gene alleles. The allele numbers of the previous genes are kept same to avoid confusion.

| Sr No. | Organism name    | <i>arcC</i> | <i>glp</i><br><i>F</i> | <i>pta</i> | <i>tpi</i> | <i>opuC</i><br><i>C</i> | <i>asp</i><br><i>S</i> | <i>rpi</i><br><i>B</i> | ST |
|--------|------------------|-------------|------------------------|------------|------------|-------------------------|------------------------|------------------------|----|
| 1      | 08-02119         | 13          | 1                      | 12         | 10         | 21                      | 2                      | 2                      | 1  |
| 2      | 08-02300         | 5           | 1                      | 4          | 6          | 6                       | 3                      | 1                      | 2  |
| 3      | 08S00974         | 3           | 19                     | 20         | 26         | 15                      | 8                      | 1                      | 3  |
| 4      | 55-99-44         | 46          | 49                     | 13         | 68         | 9                       | 5                      | 5                      | 4  |
| 5      | 293G             | 3           | 19                     | 20         | 26         | 15                      | 8                      | 1                      | 3  |
| 6      | 1625.CO1         | 3           | 1                      | 4          | 4          | 2                       | 2                      | 8                      | 5  |
| 7      | 2148.CO1         | 3           | 1                      | 4          | 4          | 2                       | 2                      | 2                      | 6  |
| 8      | ATCC 6538        | 3           | 1                      | 29         | 5          | 5                       | 3                      | 1                      | 7  |
| 9      | AUS0325          | 22          | 14                     | 12         | 4          | 17                      | 1                      | 1                      | 8  |
| 10     | BB155            | 46          | 49                     | 13         | 68         | 9                       | 5                      | 5                      | 4  |
| 11     | C2406            | 3           | 1                      | 4          | 4          | 1                       | 1                      | 1                      | 9  |
| 12     | CFSAN007835      | 10          | 8                      | 10         | 3          | 33                      | 16                     | 11                     | 10 |
| 13     | CFSAN007847      | 2           | 2                      | 6          | 3          | 13                      | 7                      | 9                      | 11 |
| 14     | CFSAN007850      | 1           | 1                      | 12         | 1          | 5                       | 1                      | 1                      | 12 |
| 15     | CFSAN007851      | 1           | 1                      | 1          | 1          | 6                       | 3                      | 1                      | 13 |
| 16     | CFSAN007883      | 19          | 15                     | 19         | 20         | 14                      | 7                      | 5                      | 14 |
| 17     | CFSAN007894      | 1           | 1                      | 12         | 1          | 5                       | 1                      | 1                      | 12 |
| 18     | EDCC5458         | 3           | 1                      | 4          | 4          | 1                       | 1                      | 1                      | 9  |
| 19     | EDCC5464         | 7           | 1                      | 8          | 8          | 7                       | 1                      | 10                     | 15 |
| 20     | FDA209P          | 3           | 1                      | 29         | 5          | 5                       | 3                      | 1                      | 7  |
| 21     | FDAARGOS_159     | 561         | 1                      | 12         | 1          | 5                       | 1                      | 1                      | 16 |
| 22     | FDAARGOS_412     | 3           | 567                    | 4          | 4          | 1                       | 1                      | 1                      | 17 |
| 23     | FORC_012         | 1           | 1                      | 4          | 4          | 10                      | 1                      | 1                      | 18 |
| 24     | FORC_026         | 1           | 1                      | 1          | 1          | 6                       | 3                      | 1                      | 13 |
| 25     | FORC_027         | 1           | 1                      | 12         | 1          | 5                       | 1                      | 1                      | 19 |
| 26     | FORC_039         | 3           | 1                      | 1          | 1          | 34                      | 4                      | 1                      | 20 |
| 27     | FORC_040         | 1           | 1                      | 4          | 4          | 10                      | 1                      | 1                      | 18 |
| 28     | FORC_045         | 1           | 1                      | 1          | 1          | 6                       | 3                      | 1                      | 13 |
| 29     | GD5              | 3           | 19                     | 20         | 26         | 15                      | 8                      | 1                      | 21 |
| 30     | GD705            | 3           | 19                     | 20         | 26         | 15                      | 8                      | 1                      | 21 |
| 31     | GD1539           | 3           | 19                     | 20         | 26         | 15                      | 8                      | 1                      | 21 |
| 32     | GD1677           | 3           | 19                     | 20         | 26         | 15                      | 8                      | 1                      | 21 |
| 33     | HC1335           | 2           | 1                      | 4          | 4          | 1                       | 1                      | 1                      | 22 |
| 34     | HG001            | 3           | 1                      | 4          | 4          | 1                       | 1                      | 1                      | 9  |
| 35     | HZW450           | 19          | 15                     | 19         | 20         | 31                      | 7                      | 5                      | 23 |
| 36     | isolate Clinical | 3           | 1                      | 4          | 4          | 1                       | 1                      | 1                      | 9  |
| 37     | Sa_Newman_UoM    | 3           | 1                      | 4          | 4          | 1                       | 1                      | 1                      | 9  |

|    |                              |    |     |     |     |    |    |    |    |
|----|------------------------------|----|-----|-----|-----|----|----|----|----|
| 38 | ISU926                       | 3  | 19  | 20  | 26  | 15 | 8  | 1  | 21 |
| 39 | ISU935                       | 1  | 1   | 12  | 1   | 5  | 1  | 1  | 19 |
| 40 | JE2                          | 3  | 1   | 4   | 4   | 1  | 1  | 1  | 9  |
| 41 | JH4899                       | 3  | 1   | 4   | 4   | 1  | 10 | 1  | 24 |
| 42 | K17                          | 3  | 1   | 264 | 1   | 3  | 2  | 2  | 25 |
| 43 | K18                          | 3  | 1   | 264 | 1   | 3  | 2  | 2  | 25 |
| 44 | LA-MRSA ST398 E154           | 3  | 19  | 20  | 26  | 15 | 8  | 1  | 21 |
| 45 | M92                          | 2  | 457 | 4   | 4   | 1  | 1  | 1  | 26 |
| 46 | MCRF184                      | 10 | 8   | 10  | 3   | 33 | 17 | 11 | 27 |
| 47 | MI                           | 1  | 1   | 12  | 1   | 5  | 1  | 1  | 19 |
| 48 | NCCP14558                    | 1  | 1   | 12  | 1   | 5  | 1  | 1  | 19 |
| 49 | NCCP14562                    | 1  | 1   | 12  | 1   | 5  | 1  | 1  | 19 |
| 50 | Newman_D2c                   | 3  | 1   | 4   | 4   | 1  | 1  | 1  | 9  |
| 51 | NZAK3                        | 1  | 1   | 12  | 1   | 5  | 1  | 1  | 19 |
| 52 | OC8                          | 3  | 1   | 4   | 4   | 1  | 12 | 1  | 28 |
| 53 | RIVM6519                     | 1  | 1   | 12  | 1   | 5  | 1  | 1  | 19 |
| 54 | SA40TW                       | 19 | 15  | 19  | 540 | 14 | 7  | 5  | 29 |
| 55 | Seattle 1945 isolate<br>G477 | 2  | 5   | 6   | 3   | 13 | 7  | 3  | 30 |
| 56 | Seattle 1945 isolate<br>G478 | 2  | 5   | 6   | 3   | 13 | 7  | 3  | 30 |
| 57 | SJTUF_J27                    | 2  | 2   | 6   | 3   | 13 | 7  | 3  | 31 |
| 58 | SR434                        | 22 | 14  | 12  | 4   | 16 | 2  | 2  | 32 |
| 59 | ST20130938                   | 13 | 1   | 12  | 11  | 11 | 1  | 1  | 33 |
| 60 | ST20130939                   | 13 | 1   | 12  | 11  | 11 | 1  | 1  | 33 |
| 61 | ST20130940                   | 13 | 1   | 12  | 11  | 11 | 1  | 1  | 33 |
| 62 | ST20130941                   | 13 | 1   | 12  | 11  | 11 | 1  | 1  | 33 |
| 63 | ST20130942                   | 4  | 4   | 5   | 5   | 8  | 1  | 6  | 34 |
| 64 | ST20130943                   | 4  | 4   | 5   | 5   | 8  | 1  | 6  | 34 |
| 65 | TMUS2126                     | 1  | 1   | 4   | 4   | 10 | 1  | 1  | 18 |
| 66 | TMUS2134                     | 1  | 1   | 4   | 4   | 10 | 1  | 1  | 18 |
| 67 | UCI 28                       | 1  | 1   | 12  | 1   | 5  | 11 | 1  | 35 |
| 68 | UCI62                        | 1  | 1   | 12  | 1   | 5  | 1  | 1  | 19 |
| 69 | USA300_SUR1                  | 3  | 1   | 4   | 4   | 1  | 1  | 1  | 36 |
| 70 | USA300-SUR9                  | 3  | 1   | 4   | 4   | 1  | 1  | 1  | 36 |
| 71 | USA300-SUR10                 | 3  | 1   | 4   | 4   | 1  | 1  | 1  | 36 |
| 72 | USA300-SUR11                 | 3  | 1   | 4   | 4   | 1  | 1  | 1  | 36 |
| 73 | USA300-SUR12                 | 3  | 1   | 4   | 4   | 1  | 1  | 1  | 36 |
| 74 | USA300-SUR13                 | 3  | 1   | 4   | 4   | 1  | 1  | 1  | 36 |
| 75 | USA300-SUR14                 | 3  | 1   | 4   | 4   | 1  | 1  | 1  | 36 |
| 76 | USA300-SUR15                 | 3  | 1   | 4   | 4   | 1  | 1  | 1  | 36 |
| 77 | USA300-SUR16                 | 3  | 1   | 4   | 4   | 1  | 1  | 1  | 36 |

|        |                    |    |    |    |    |    |    |    |    |
|--------|--------------------|----|----|----|----|----|----|----|----|
| 78     | USA300-SUR17       | 3  | 1  | 4  | 4  | 1  | 1  | 1  | 36 |
| 79     | USA300-SUR18       | 3  | 1  | 4  | 4  | 1  | 1  | 1  | 36 |
| 80     | USA300-SUR19       | 3  | 1  | 4  | 4  | 1  | 1  | 1  | 36 |
| 81     | USA300-SUR20       | 3  | 1  | 4  | 4  | 1  | 1  | 1  | 36 |
| 82     | USA300-SUR21       | 3  | 1  | 4  | 4  | 1  | 1  | 1  | 36 |
| 83     | USA300-SUR22       | 3  | 1  | 4  | 4  | 1  | 1  | 1  | 36 |
| 84     | USA300-SUR23       | 3  | 1  | 4  | 4  | 1  | 1  | 1  | 36 |
| 85     | USA300-SUR24       | 3  | 1  | 4  | 4  | 1  | 1  | 1  | 36 |
| 86     | USA400-0051        | 1  | 1  | 1  | 1  | 6  | 3  | 1  | 13 |
| 87     | UTSW MRSA 55       | 3  | 1  | 4  | 4  | 1  | 1  | 1  | 36 |
| 88     | ZJ5499             | 1  | 1  | 12 | 1  | 5  | 1  | 1  | 19 |
| 89     | V521               | 2  | 1  | 4  | 4  | 1  | 1  | 1  | 22 |
| 90     | 04-02981           | 1  | 1  | 12 | 25 | 19 | 1  | 1  | 37 |
| 91     | 08BA02176          | 3  | 19 | 20 | 26 | 15 | 8  | 1  | 21 |
| 92     | 25b_MRSA           | 3  | 1  | 4  | 4  | 1  | 1  | 1  | 36 |
| 93     | 27b_MRSA           | 3  | 1  | 4  | 4  | 1  | 1  | 1  | 36 |
| 94     | 26b_MRSA           | 3  | 1  | 4  | 4  | 1  | 1  | 1  | 36 |
| 95     | 29b_MRSA           | 3  | 1  | 4  | 4  | 1  | 1  | 1  | 36 |
| 96     | 31b_MRSA           | 3  | 1  | 4  | 4  | 1  | 1  | 1  | 36 |
| 9<br>7 | 33b                | 3  | 1  | 4  | 4  | 1  | 1  | 1  | 36 |
| 98     | 502A               | 1  | 1  | 12 | 1  | 18 | 2  | 2  | 38 |
| 99     | 2395 USA500        | 3  | 1  | 4  | 4  | 1  | 1  | 1  | 36 |
| 100    | 6850               | 16 | 12 | 13 | 13 | 12 | 1  | 1  | 39 |
| 101    | 11819-97           | 1  | 1  | 11 | 51 | 4  | 1  | 1  | 40 |
| 102    | 552053             | 2  | 2  | 6  | 3  | 23 | 7  | 3  | 41 |
| 103    | ATCC 25923         | 2  | 5  | 6  | 3  | 13 | 7  | 3  | 30 |
| 104    | aureus ST228 16125 | 1  | 1  | 12 | 24 | 5  | 1  | 1  | 42 |
| 105    | aureus ST228 18583 | 1  | 1  | 12 | 24 | 5  | 1  | 1  | 42 |
| 106    | BA01611            | 3  | 1  | 1  | 1  | 4  | 1  | 1  | 43 |
| 107    | Be62               | 2  | 1  | 4  | 4  | 1  | 1  | 1  | 22 |
| 108    | Bmb9393            | 2  | 1  | 4  | 4  | 1  | 1  | 1  | 22 |
| 109    | CA12               | 3  | 1  | 4  | 4  | 1  | 1  | 1  | 36 |
| 110    | CA15               | 3  | 1  | 4  | 4  | 1  | 1  | 1  | 36 |
| 111    | CA-347             | 10 | 8  | 10 | 3  | 33 | 16 | 11 | 10 |
| 112    | COL                | 3  | 1  | 4  | 4  | 1  | 1  | 1  | 36 |
| 113    | DSM 20231          | 3  | 1  | 4  | 4  | 1  | 1  | 1  | 36 |
| 114    | ECT-R 2            | 1  | 1  | 12 | 1  | 5  | 1  | 1  | 19 |
| 115    | ED98               | 1  | 1  | 12 | 1  | 5  | 1  | 1  | 19 |
| 116    | ED133              | 6  | 46 | 7  | 50 | 24 | 14 | 12 | 44 |
| 117    | FCFHV36            | 1  | 1  | 12 |    | 5  | 1  | 1  | 45 |
| 118    | FORC_001           | 2  | 2  | 6  | 3  | 13 | 7  | 3  | 31 |

|     |                     |    |    |    |    |    |    |    |    |
|-----|---------------------|----|----|----|----|----|----|----|----|
| 119 | CN1                 | 1  | 1  | 4  | 4  | 10 | 1  | 1  | 18 |
| 120 | GR2                 | 1  | 1  | 11 | 51 | 4  | 1  | 1  | 40 |
| 121 | Gv51                | 2  | 1  | 4  | 4  | 1  | 1  | 1  | 22 |
| 122 | Gv69                | 2  | 1  | 4  | 4  | 1  | 2  | 1  | 46 |
| 123 | Gv88                | 2  | 1  | 4  | 4  | 1  | 1  | 1  | 22 |
| 124 | HC1340              | 2  | 1  | 4  | 4  | 1  | 1  | 1  | 22 |
| 125 | H-EMRSA-15          | 7  | 1  | 8  | 8  | 7  | 1  | 10 | 15 |
| 126 | HO 5096 0412        | 7  | 1  | 8  | 8  | 7  | 1  | 10 | 15 |
| 127 | HOU1444-VR          | 1  | 1  | 12 | 1  | 5  | 1  | 1  | 19 |
| 128 | HUV05               | 3  | 1  | 4  | 4  | 1  | 1  | 1  | 36 |
| 129 | ILRI_Eymole11       | 2  | 2  | 6  | 3  | 13 | 7  | 3  | 31 |
| 130 | JH1                 | 1  | 1  | 12 | 1  | 5  | 1  | 1  | 19 |
| 131 | JH9                 | 1  | 1  | 12 | 1  | 5  | 1  | 1  | 19 |
| 132 | JKD6008             | 2  | 1  | 4  | 4  | 1  | 1  | 1  | 22 |
| 133 | JKD6159             | 6  | 44 | 43 | 55 | 27 | 13 | 7  | 47 |
| 134 | JS395               | 10 | 34 | 26 | 32 | 33 | 18 | 11 | 48 |
| 135 | LGA251              | 18 | 6  | 7  | 50 | 32 | 6  | 7  | 49 |
| 136 | M013                | 19 | 15 | 19 | 20 | 14 | 7  | 5  | 14 |
| 137 | M121                | 3  | 1  | 4  | 4  | 1  | 1  | 1  | 36 |
| 138 | MRSA252             | 2  | 2  | 3  | 3  | 13 | 7  | 3  | 50 |
| 139 | MS4                 | 19 | 15 | 19 | 20 | 14 | 7  | 5  | 14 |
| 140 | MSSA476             | 1  | 1  | 1  | 1  | 6  | 3  | 1  | 13 |
| 141 | Mu3                 | 1  | 1  | 12 | 1  | 5  | 1  | 1  | 19 |
| 142 | Mu50                | 1  | 1  | 12 | 1  | 5  | 1  | 1  | 19 |
| 143 | MW2                 | 1  | 1  | 1  | 1  | 6  | 3  | 1  | 13 |
| 144 | N315                | 1  | 1  | 12 | 1  | 5  | 1  | 1  | 19 |
| 145 | NCTC 8325           | 3  | 1  | 4  | 4  | 1  | 1  | 1  | 36 |
| 146 | NCTC13435           | 1  | 1  | 11 | 51 | 4  | 1  | 1  | 40 |
| 147 | NRS 100             | 3  | 1  | 4  | 4  | 5  | 19 | 1  | 51 |
| 148 | O46 chromosome      | 6  | 45 | 7  | 14 | 30 | 20 | 1  | 52 |
| 149 | RF122               | 6  | 12 | 49 | 67 | 28 | 15 | 13 | 53 |
| 150 | RIVM1295            | 3  | 19 | 20 | 26 | 15 | 8  | 1  | 21 |
| 151 | RIVM1607            | 3  | 19 | 20 | 26 | 15 | 8  | 1  | 21 |
| 152 | RIVM3897            | 3  | 19 | 20 | 26 | 15 | 8  | 1  | 21 |
| 153 | RKI4                | 3  | 1  | 1  | 22 | 4  | 1  | 1  | 54 |
| 154 | SA40                | 19 | 15 | 19 | 20 | 14 | 7  | 5  | 14 |
| 155 | SA268               | 19 | 15 | 19 | 20 | 14 | 7  | 5  | 14 |
| 156 | SA564               | 1  | 1  | 12 | 1  | 5  | 1  | 1  | 19 |
| 157 | SA957               | 19 | 15 | 19 | 20 | 14 | 7  | 5  | 14 |
| 158 | ST228 isolate 10388 | 1  | 1  | 12 | 24 | 5  | 1  | 1  | 42 |
| 159 | ST228 isolate 10497 | 1  | 1  | 12 | 24 | 5  | 1  | 1  | 42 |

|     |                     |     |    |    |    |    |    |   |    |
|-----|---------------------|-----|----|----|----|----|----|---|----|
| 160 | ST228 isolate 15532 | 1   | 1  | 12 | 24 | 5  | 1  | 1 | 42 |
| 161 | ST228 isolate 16035 | 1   | 1  | 12 | 24 | 5  | 1  | 1 | 42 |
| 162 | ST228 isolate 18341 | 1   | 1  | 12 | 24 | 5  | 1  | 1 | 42 |
| 163 | ST228 isolate 18412 | 1   | 1  | 12 | 24 | 5  | 1  | 1 | 42 |
| 164 | ST398               | 3   | 19 | 20 | 26 | 15 | 8  | 1 | 21 |
| 165 | strain DAR4145      | 1   | 1  | 22 | 1  | 5  | 1  | 1 | 55 |
| 166 | str. Newman         | 3   | 1  | 4  | 4  | 1  | 1  | 1 | 36 |
| 167 | T0131               | 2   | 1  | 4  | 4  | 1  | 1  | 1 | 22 |
| 168 | Tager 104           | 14  | 11 | 13 | 12 | 25 | 9  | 2 | 56 |
| 169 | TCH60               | 551 | 2  | 6  | 3  | 22 | 9  | 3 | 57 |
| 170 | TW20                | 2   | 1  | 4  | 4  | 1  | 1  | 1 | 22 |
| 171 | UA-S391_USA300      | 3   | 1  | 4  | 4  | 1  | 1  | 1 | 36 |
| 172 | USA300_2014.C01     | 3   | 1  | 4  | 4  | 1  | 1  | 1 | 36 |
| 173 | USA300_FPR3757      | 3   | 1  | 4  | 4  | 1  | 1  | 1 | 36 |
| 174 | USA300_TCH1516      | 3   | 1  | 4  | 4  | 1  | 1  | 1 | 36 |
| 175 | USA300-ISMMMS1      | 3   | 1  | 4  | 4  | 1  | 1  | 1 | 36 |
| 176 | V2200               | 3   | 1  | 4  | 4  | 1  | 1  | 1 | 36 |
| 177 | VC40                | 3   | 1  | 4  | 4  | 1  | 1  | 1 | 36 |
| 178 | XQ                  | 6   | 6  | 7  | 14 | 26 | 6  | 1 | 58 |
| 179 | Z172                | 2   | 1  | 4  | 4  | 1  | 1  | 1 | 22 |
| 180 | 1969.N              | 3   | 1  | 4  | 4  | 2  | 2  | 2 | 6  |
| 181 | 1971.C01            | 90  | 1  | 4  | 4  | 2  | 2  | 2 | 59 |
| 182 | 2148.N              | 484 | 1  | 4  | 4  | 20 | 2  | 2 | 60 |
| 183 | NZ15MR0322          | 3   | 19 | 20 | 26 | 15 | 8  | 1 | 21 |
| 184 | O11                 | 6   | 45 | 7  | 95 | 29 | 21 | 1 | 61 |
| 185 | USA300_2014.C02     | 3   | 1  | 4  | 4  | 2  | 2  | 2 | 6  |
| 186 | V605                | 2   | 1  | 4  | 4  | 1  | 1  | 1 | 22 |
| 187 | XN108               | 2   | 1  | 4  | 4  | 1  | 1  | 1 | 22 |
